# Supplementary material
Source: Springer Nature journal article supplement (https://www.springermedizin.de/resource/supplementary/12913_2011_2064_MOESM1_ESM.pdf/9529598)
Supplement: MOESM1 [file 9529598]

**Table 1 Participant characteristics**

| <b>Cultural Background of participants</b> | <b>Site of recruitment</b>                                                                   | <b>No. of participants</b> | <b>Mean time in Aus. (yrs)</b> | <b>No. of children (A: born in Australia, O: born overseas)</b> | <b>Who was the interpreter for focus group?</b>           |
|--------------------------------------------|----------------------------------------------------------------------------------------------|----------------------------|--------------------------------|-----------------------------------------------------------------|-----------------------------------------------------------|
| Karen<br>Burmese                           | Playgroup organised by refugee mentor                                                        | 14                         | 5.6                            | A: 15<br>O: 26                                                  | Bilingual refugee mentor (also an accredited interpreter) |
| Karen<br>Burmese                           | Playgroup organised by refugee mentor                                                        | 29                         | 5.5                            | A: 32<br>O: 50                                                  | Bilingual refugee mentor (also an accredited interpreter) |
| Karen<br>Burmese                           | Kindergarten                                                                                 | 4                          | 3.3                            | A: 4<br>O: 7                                                    | Accredited Interpreter                                    |
| Iraqi<br>Assyrian Chaldean                 | Playgroup organised by refugee mentor                                                        | 18                         | 8.5                            | A: 38<br>O: 12                                                  | Bilingual refugee mentor                                  |
| Iraqi<br>Assyrian Chaldean<br>Lebanese     | Studying English at an adult English language centre organised by an cultural welfare agency | 8                          | 4.3                            | A: 11<br>O: 11                                                  | Bilingual community representative                        |
| South Sudanese                             | Playgroup organised by refugee mentor                                                        | 7                          | 6.3                            | A: 16<br>O: 17                                                  | Bilingual refugee mentor                                  |

|           |                                                             |   |     |              |                           |
|-----------|-------------------------------------------------------------|---|-----|--------------|---------------------------|
| Bhutanese | Peer education<br>program at<br>community health<br>service | 7 | 1.6 | A: 4<br>O: 6 | Accredited<br>Interpreter |
|-----------|-------------------------------------------------------------|---|-----|--------------|---------------------------|
